# Supplementary material for: Primary Salivary Human Stem/Progenitor Cells Undergo Microenvironment‐Driven Acinar‐Like Differentiation in Hyaluronate Hydrogel Culture
Source: PubMed Central journal article supplement (PMC5442728; doi:10.5966/sctm.2016-0083), 2016-08-18
Supplement: SCT3-6-110-s001.pdf [file SCT3-6-110-s001.pdf]

Supplemental Information - Pradhan-Bhatt and Farach-Carson et al.

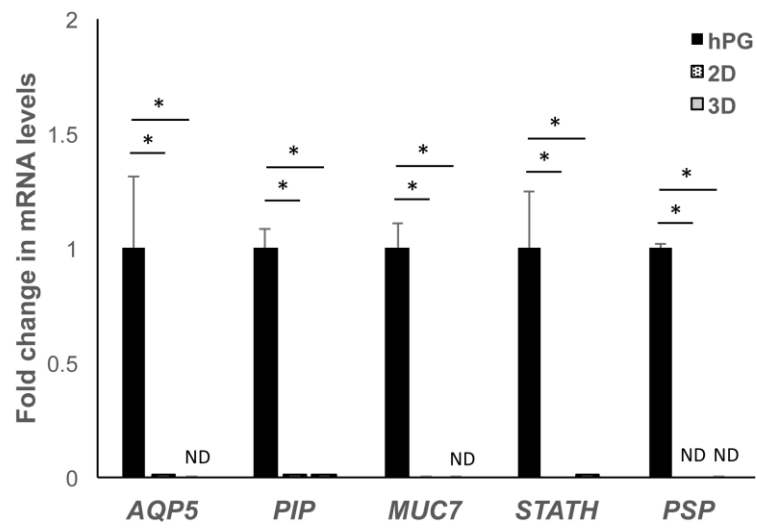

**Figure S1.** Levels of acinar differentiation markers are significantly lower among hS/PCs grown in 2D and 3D HA hydrogels compared to the native hPG tissue.

## Supplemental Tables

**Table S1.** A list of primer sequences used in this study. Primers for *BHLHA15* were obtained commercially (Qiagen, NM\_177455).

**Table S1**

| Genes          | Sense                    | Antisense                |
|----------------|--------------------------|--------------------------|
| <i>GAPDH</i>   | CAGCCTCAAGATCATCAGCA     | TGTGGTCATGAGTCCTTCCA     |
| <i>RPS29</i>   | CAATATGTGCCGCCAGTGT      | GAAGGAAGAGCATTTAGTCCAACT |
| <i>K5</i>      | CGTGCCGCAGTTCTATATTCT    | ACTTTGGGTTCTCGTGTCAG     |
| <i>K14</i>     | CACAGATCCCACTGGAAGAT     | GATAATGAAGCTGTATTGATTGCC |
| <i>MYC</i>     | CGGAACTCTTGTGCGTAAGG     | TCATAGGTGATTGCTCAGGACAT  |
| <i>ETV4</i>    | CAGACGGACTTCGCCTAC       | GGAATGGTCGCAGAGGTT       |
| <i>ETV5</i>    | GTGATACTGACAGGTAAGCAACA  | AGAGCAGGCAGCAAGGTA       |
| <i>KIT</i>     | GTCTCCACCATCCATCCA       | TCCATTATTCTGCTTATTCTCA   |
| <i>AMY1A</i>   | CTCGGCACAGTTATTCGCAAGTGG | ACAGCCTAGCATCCCAGAAGGT   |
| <i>K19</i>     | CTGCCTCCAAGGTCCTCT       | CCCATCCCTCTACCCAGAAG     |
| <i>TFCP2L1</i> | GCCGCCTGCTTCCTGTTC       | CTGCCCACCACTGCTCAAAG     |
| <i>PSP</i>     | TCTGAAGAGGACGAATGAGGAGGA | AGGCTTTCACGCTGGTTAGGT    |
| <i>STATH</i>   | AAGAGAACCCAGCCAACATGAAG  | TGTTGGTATTGTGGTTGGTATGGT |
| <i>PIP</i>     | TCTCTGGGACACATTGCCTTCTG  | TGATCTCCGAGTGTTGCCTGAG   |
| <i>AQP5</i>    | CTGTCCATTGGCCTGTCTGTC    | GGCTCATACGTGCCTTTGATC    |
| <i>MUC7</i>    | GCTCCACCAGAGACCACAG      | GCTGAGGCCGATGATGGG       |

**Table S2.** hS/PCs encapsulated in 3D HA hydrogels modified with basement membrane-derived peptides yield higher quality and quantity of mRNA than unmodified HA gels.

**TABLE S2**

| Sample # | hS/PCs in Unmodified Gels |         | hS/PCs in Peptide-Modified Gels |         |
|----------|---------------------------|---------|---------------------------------|---------|
|          | mRNA (ng/ $\mu$ l)        | 260/280 | mRNA (ng/ $\mu$ l)              | 260/280 |
| 1        | 9.4                       | 1.74    | 25.9                            | 1.72    |
| 2        | 13.1                      | 1.43    | 31.3                            | 1.78    |
| 3        | 4.8                       | 1.47    | 23.7                            | 1.71    |
| Average  | 9.1                       | 1.55    | 26.97                           | 1.74    |

**Table S3.** A list of primary antibodies used in this study.

**TABLE S3**

| <b>Target protein</b>       | <b>Vendor</b>            | <b>Item #</b> | <b>Host Species</b> | <b>Dilution</b> |
|-----------------------------|--------------------------|---------------|---------------------|-----------------|
| <b>Cytokeratin 5 (K5)</b>   | Biolegend                | PRB160-P      | Rabbit              | 1:1000          |
| <b>Cytokeratin 14 (K14)</b> | Abcam                    | Ab49747       | Mouse               | 1:100           |
| <b>KIT</b>                  | Santa Cruz Biotechnology | SC1491        | Goat                | 1:10            |
| <b>Ki67</b>                 | BD Pharmingen            | 550609        | Mouse               | 1:50            |
| <b>MIST1</b>                | Santa Cruz Biotechnology | SC80984       | Mouse               | 1:50            |
| <b>Amylase</b>              | Sigma                    | A8273         | Rabbit              | 1:100           |
